# Supplementary material
Source: publisher figshare collection journal article supplement (https://frontiersin.figshare.com/ndownloader/files/26148920)
Supplement: Supplementary file [file 26148920]

**Supplementary Table 1.** Characteristics of included and excluded studies in the meta-analysis of the associations between vaccination and childhood cancer, 1963-2017

| First Author, Year            | Location                                        | Study Years | No. of Cases | No. of Controls | Age Range | Cancer Sites               | Vaccines [Early Age]                         | Results                                                                | Outcome   | Exposure    | Study Design         | Comment                                                                                                                        | Study Quality <sup>a</sup> |
|-------------------------------|-------------------------------------------------|-------------|--------------|-----------------|-----------|----------------------------|----------------------------------------------|------------------------------------------------------------------------|-----------|-------------|----------------------|--------------------------------------------------------------------------------------------------------------------------------|----------------------------|
| Fraumeni, 1963                | USA                                             | 1950-1959   | -            | -               | >1        | Cancer                     | Polio                                        | No association                                                         | -         | Record      | Ecological           | Exc: without complete estimates; cancer death                                                                                  | 6.9<br>3                   |
| Innis, 1965                   | Australia (Brisbane)                            | 1958-1964   | 59           | 343             | children  | Leukemia                   | Any (D, P, T) [ $>3m$ ]                      | $\uparrow$ risk                                                        | Hospital  | Record      | Case-control         | Exc: without complete estimates; hospital-based; pilot study; letter to editor; original study of Innis 1968                   | 12.2<br>2                  |
| Stewart, 1965 <sup>a</sup>    | England (Oxford)                                | 1953-1965   | 2107         | 2107            | <9        | Cancer, leukemia           | D, T, P, Sma, Polio, BCG, Yel, Typ           | No association                                                         | Hospital  | Self-report | Case-control         | Exc: overlapping population; cancer death; population-based; letter to the editor; original study of Kneale 1986 & Gilman 1989 | 7.7<br>2                   |
| Innis, 1968 <sup>a,d</sup>    | Australia (Sydney, Brisbane)                    | 1958-1967   | 816          | 816             | children  | Cancer                     | D, T, P, Polio, Sma, BCG, Typ, Cho [ $<1y$ ] | $\uparrow$ risk after polio vaccination $>1y$ ; others: no association | Hospital  | Record      | Case-control         | [Mat: age, sex;] hospital-based without cancer; update of Innis 1965                                                           | 15.8<br>3                  |
| Davignon, 1970 <sup>a,d</sup> | Canada (Quebec)                                 | 1960-1963   | 96           | 191             | <15       | Leukemia                   | BCG                                          | $\downarrow$ leukemia mortality rates in vaccinated group              | Registry  | Registry    | Retrospective cohort | Mortality rate; irrelevant errors in table 1 corrected by Davignon 1971                                                        | 23.9<br>4                  |
| Waler, 1970                   | Norway, Denmark, Sweden                         | 1964-1968   | -            | -               | 0-43      | Leukemia                   | BCG                                          | No association                                                         | -         | -           | Ecological           | Exc: without complete estimates; age specific mortality; letter to editor; original study of Villumsen 2009                    | -3.4<br>3                  |
| Berkeley, 1971                | Scotland (Glasgow, Dundee, Aberdeen, Edinburgh) | 1939-1968   | -            | -               | 0-14      | Leukemia                   | BCG                                          | $\uparrow$ leukemia mortality after BCG in all age groups              | Registry  | -           | Ecological           | Exc: without complete estimates; outcome cancer deaths; letter to editor                                                       | 4.2<br>3                   |
| Comstock, 1971 <sup>a</sup>   | USA (Georgia, Alabama)                          | 1950-1971   | 60           | -               | >5        | Leukemia, lymphoma, HL     | BCG                                          | No association                                                         | Hospital  | Trial       | Retrospective cohort | Exc: overlapping population; [Adj: age, race;] trial-based; original study of Kendrick 1981                                    | 20.8<br>4                  |
| Hems, 1971                    | England, Wales                                  | 1940-1970   | -            | -               | 10-29     | Leukemia                   | BCG                                          | $\downarrow$ leukemia mortality                                        | -         | -           | Ecological           | Exc: without complete estimates; cancer deaths; letter to editor; latency considered                                           | -2.2<br>3                  |
| Kinlen, 1971                  | Canada (Quebec), Scotland (Glasgow)             | 1950-1969   | -            | -               | <19       | Leukemia                   | BCG                                          | No association                                                         | Registry  | Registry    | Ecological           | Exc: without complete estimates; standardized incidence ratio                                                                  | 4.9<br>3                   |
| MRC, 1972 <sup>a,d</sup>      | England                                         | 1950-1952   | 65           | 54174           | 15-30     | Cancer, leukemia, lymphoma | BCG                                          | No association                                                         | Follow-Up | Trial       | Retrospective cohort | Mortality rate; outcome incidence & cancer deaths; trial-based; original study of Sutherland 1982                              | 21.4<br>5                  |

Table continues

**Supplementary Table 1.** Continued

| First Author, Year            | Location             | Study Years | No. of Cases | No. of Controls | Age Range       | Cancer Sites                                                           | Vaccines [Early Age]  | Results                                                    | Outcome           | Exposure         | Study Design         | Comment                                                                                                                | Study Quality <sup>a</sup> |
|-------------------------------|----------------------|-------------|--------------|-----------------|-----------------|------------------------------------------------------------------------|-----------------------|------------------------------------------------------------|-------------------|------------------|----------------------|------------------------------------------------------------------------------------------------------------------------|----------------------------|
| Rosenthal, 1972 <sup>a</sup>  | USA (Chicago)        | 1964-1969   | 22           | 227378          | 0-6             | Leukemia                                                               | BCG [newborns]        | ↑ mortality rate in unvaccinated infants                   | Registry          | Record           | Retrospective cohort | Exc: overlapping population; mortality rate; immigration not factored; [Adj: age race;] original study of Crispen 1976 | 23.5<br>7                  |
| Heinonen, 1973 <sup>a,d</sup> | USA                  | 1959-1965   | 24           | 50873           | 0-4             | Cancer, Neural tumors, leukemia                                        | Polio, Inf [prenatal] | ↑ risk after prenatal killed polio; others: no association | Record            | Self-report      | Cohort               | [Adj: race;] prenatal vaccination                                                                                      | 19.6<br>7                  |
| Mathé, 1974 <sup>a,d</sup>    | France               | 1965        | 130          | 130             | <20             | Leukemia                                                               | BCG                   | No association                                             | Hospital          | Vaccination card | Case-control         | [Mat: age;] population-based without cancer; socioeconomical status not considered                                     | 11.2<br>3                  |
| Comstock, 1975 <sup>a,d</sup> | Puerto Rico          | 1949-1951   | 135          | 77877           | 1-18            | Cancer, leukemia, lymphoma, HL, brain, bone, skin, kidney <sup>e</sup> | BCG                   | No association                                             | Registry          | Trial            | Retrospective cohort | Trial based, trial arm according to birth year; original study of Snider 1978                                          | 25.1<br>5                  |
| Salonen, 1975 <sup>d</sup>    | Finland              | 1959-1968   | 972          | 972             | <15             | Cancer, leukemia, brain, eye, kidney, bone, other                      | Polio, BCG            | No association                                             | Registry          | Record           | Case-control         | Mat: age, area, birth season; population-based without cancer; original study of Salonen 1976                          | 25.8<br>6                  |
| Crispen, 1976 <sup>a,d</sup>  | USA (Chicago)        | 1957-1969   | 319          | 619907          | <20             | Cancer, leukemia                                                       | BCG [newborns]        | ↓ risk for cancer death in vaccinated group                | Death certificate | Record           | Retrospective cohort | Mortality rate; update of Rosenthal 1972                                                                               | 21.5<br>5                  |
| Salonen, 1976 <sup>a,d</sup>  | Finland              | 1959-1968   | 972          | 972             | <15             | Cancer, leukemia, brain, eye, kidney, bone, other tumors               | Any, BCG              | No association                                             | Registry          | Record           | Case-control         | [Mat: age, area, birth season;] population-based without cancer; update of Salonen 1975                                | 22.4<br>5                  |
| Hofman, 1977                  | Europe               | 1965-1972   | -            | -               | 0-24            | Leukemia                                                               | BCG                   | ↓ mortality in countries with obligatory BCG               | -                 | -                | Ecological           | Exc: without complete estimates; article in Polish                                                                     | -2.6<br>3                  |
| Ambrosch, 1978                | Austria              | 1954-1976   | -            | -               | 0-5             | Leukemia                                                               | BCG                   | ↓ leukemia mortality age 0-5 after BCG in newborns         | -                 | -                | Ecological           | Exc: without complete estimates; protection rate                                                                       | -0.6<br>3                  |
| Andersen, 1978 <sup>a,d</sup> | Denmark (Copenhagen) | 1943-1970   | 63           | 182             | school children | HL                                                                     | BCG                   | No association                                             | Registry          | Record           | Case-control         | [Mat: age, sex, socioeconomical status;] 1:3; population-based without cancer; Fisher's exact test                     | 19.3<br>3                  |
| Sinniah, 1978                 | Malaysia             | 1968-1975   | 38           | 16171           | children        | ALL                                                                    | BCG                   | No association                                             | Hospital          | -                | Ecological           | Exc: without complete estimates; comparison of individual vaccination rates of cases & aggregated controls             | 11.5<br>4                  |

Table continues

**Supplementary Table 1.** Continued

| First Author, Year                  | Location                           | Study Years | No. of Cases | No. of Controls | Age Range                   | Cancer Sites                                                                             | Vaccines [Early Age]  | Results                                                                 | Outcome           | Exposure    | Study Design         | Comment                                                                                                                                                        | Study Quality <sup>a</sup> |
|-------------------------------------|------------------------------------|-------------|--------------|-----------------|-----------------------------|------------------------------------------------------------------------------------------|-----------------------|-------------------------------------------------------------------------|-------------------|-------------|----------------------|----------------------------------------------------------------------------------------------------------------------------------------------------------------|----------------------------|
| Skegg, 1978                         | New Zealand (North & South Island) | 1955-1973   | -            | -               | 13-23                       | HL, NHL, leukemia                                                                        | BCG                   | No association                                                          | Registry          | Registry    | Ecological           | Exc: without complete estimates; Adj: routine vaccination                                                                                                      | 10.0<br>4                  |
| Snider, 1978 <sup>a,d</sup>         | Puerto Rico                        | 1949-1973   | 227          | 77745           | 1-18                        | Cancer, leukemia, lymphoma, HL, brain, bone, skin, kidney <sup>e</sup>                   | BCG                   | No association                                                          | Registry          | Trial       | Retrospective cohort | Trial based, trial arm according to birth year; update von Comstock, 1975                                                                                      | 24.5<br>4                  |
| Farwell, 1979 <sup>a,d</sup>        | USA (Connecticut)                  | 1956-1962   | 120          | 240             | ≤19                         | Central nervous system, glioma, medulloblastoma                                          | Polio [prenatal]      | ↑ risk for medullablastoma; others: no association                      | Registry          | Self-report | Case-control         | [Mat: age, sex, area of residence;] original study of Farwell 1984                                                                                             | 15.8<br>3                  |
| Nilsson, 1979                       | Sweden                             | 1976-1977   | 37           | 194314          | <2 (≤7)                     | Cancer                                                                                   | BCG [newborns]        | No association                                                          | Registry          | -           | Ecological           | Exc: without complete estimates; letter to editor                                                                                                              | 6.2<br>3                   |
| Neumann, 1980 <sup>a,d</sup>        | Germany                            | 1972-1976   | 74           | 74              | ≤14                         | Cancer, leukemia                                                                         | D, T, Polio, BCG, Pox | No association                                                          | Death certificate | Self-report | Case-control         | Cancer death; [Mat: age, sex;] population-based; article in German                                                                                             | 13.8<br>3                  |
| Kendrick, 1981 <sup>a,d</sup>       | USA (Georgia, Alabama)             | 1950-1977   | 852          | 33915           | >5-<20 cancer; >5 sub-sites | Cancer, leukemia, multiple myeloma, lymphoma, HL, bone, brain, skin, kidney <sup>f</sup> | BCG                   | No association                                                          | -                 | Trial       | Retrospective cohort | Trial-based; update of Comstock 1971                                                                                                                           | 21.2<br>3                  |
| Gruffermann, 1982                   | USA (North Carolina)               | 1967-1976   | 33           | 99              | 0-14                        | Rhabdomyo-sarcoma                                                                        | Any, Sma, MMR, DTP    | ↓ risk after smallpox vaccination; others: no association               | Hospital          | Self-report | Case-control         | Exc: rare cancer; Mat: age, sex, race; Results from unmatched analyses; population-based                                                                       | 17.8<br>3                  |
| Sutherland, 1982 <sup>a,d</sup>     | England                            | 1950-1979   | 28           | 54211           | 15-30                       | Leukemia                                                                                 | BCG                   | No association                                                          | Registry          | Trial       | Retrospective cohort | Mortality rate; trial-based; update / external validation of trial follow-up using registry data of MRC 1972                                                   | 23.8<br>5                  |
| Farwell, 1984                       | USA (Connecticut)                  | 1951-1974   | 180          | 360             | 0-19                        | Medulloblastoma                                                                          | Polio [prenatal]      | ↑ risk for medullablastoma after prenatal exposure to polio vaccination | Registry          | Self-report | Case-control         | Exc: without complete estimates; Mat: age, sex, area of residence; information for prenatal vaccination for ~60% of cases and controls; update of Farwell 1979 | 18.6<br>3                  |
| Van Steensel-Moll 1985 <sup>d</sup> | Netherlands                        | 1973-1982   | 625          | 615             | <15                         | Leukemia                                                                                 | Any [prenatal]        | No association                                                          | Registry          | Self-report | Case-control         | Mat: age, sex, area; Adj: age, sex; population-based                                                                                                           | 21.8<br>5                  |

Table continues

**Supplementary Table 1.** Continued

| First Author, Year          | Location                                       | Study Years | No. of Cases | No. of Controls | Age Range | Cancer Sites                                                                                             | Vaccines [Early Age]                                      | Results                                                                                                                                                                                                                                                                                   | Outcome  | Exposure    | Study Design | Comment                                                                                                                                                                                                                                                        | Study Quality <sup>a</sup> |
|-----------------------------|------------------------------------------------|-------------|--------------|-----------------|-----------|----------------------------------------------------------------------------------------------------------|-----------------------------------------------------------|-------------------------------------------------------------------------------------------------------------------------------------------------------------------------------------------------------------------------------------------------------------------------------------------|----------|-------------|--------------|----------------------------------------------------------------------------------------------------------------------------------------------------------------------------------------------------------------------------------------------------------------|----------------------------|
| Kneale, 1986 <sup>c,d</sup> | England (Oxford)                               | 1953-1977   | 12281        | 12281           | 0-15      | Cancer, leukemia, lymphoma, cerebral tumor, neuroblastoma, osteosarcoma, Wilms tumor, other solid tumors | Any [0-1y], Sma, DT, P, Mea, Rub, Polio, BCG              | ↓ death risk for leukemia, wilms tumor, neuroblastoma, cerebral tumor & other solid tumors; ↓ death risk for cancer onset age 0-1 after vaccination age 0-1, onset age 2-4 after vaccination age 0-1 & 2-4, onset age 10-15 after vaccination age 10-15 & all ages; others no association | Hospital | Self-report | Case-control | Cancer death; Mat: sex, area, birth date (birth year, season); % risk; population-based child alive; Update of Stewart 1965                                                                                                                                    | 19.6<br>4                  |
| McKinney, 1987 <sup>d</sup> | England (West Midlands, North West, Yorkshire) | 1980-1983   | 234          | 468             | 1-15      | Leukemia, ML, lymphoma                                                                                   | Any (T, D, P, Polio, Mea, triple, Sma)                    | ↓ risk for leukemia in general; no association for myeloid leukemia, leukemia/ lymphoma, lymphoma                                                                                                                                                                                         | Registry | Self-report | Case-control | Mat: age, sex; hospital-based without cancer; original study of Hartley 1988                                                                                                                                                                                   | 22.6<br>4                  |
| Hartley, 1988               | England (West Midlands, North West, Yorkshire) | 1980-1983   | 550          | 1110            | 2-14      | Cancer                                                                                                   | Any (T, D, P, Polio, R, Mea, Sma)                         | ↓ risk for childhood cancer after 1+ vaccination compared to unvaccinated                                                                                                                                                                                                                 | Registry | Self-report | Case-control | Exc: rare vaccination; Mat: age, sex; hospital-based without cancer; never versus 1+; update of McKinney 1978                                                                                                                                                  | 18.2<br>2                  |
| Gilman, 1989 <sup>b</sup>   | England, Scotland, Wales                       | 1953-1979   | 8059         | 8059            | Children  | Cancer                                                                                                   | Any [prenatal], gamma globulin, Inf, Polio, Sma, T, other | ↑ risk for childhood cancer after prenatal vaccination in general and after smallpox vaccination; others: no association                                                                                                                                                                  | Hospital | Self-report | Case-control | Exc: rare vaccination; cancer death; Mat: sex, area, birth date (birth year, season); Adj: other factors; self-report supplied by general practitioner in 55% of cases and 59% of controls; population-based child alive; update of Stewart 1965 & Kneale 1986 | 21.2<br>5                  |
| Nishi, 1989 <sup>d</sup>    | Japan (Hokkaido)                               | 1986-1987   | 63           | 126             | 0-14      | Non-T cell ALL                                                                                           | BCG, Mea [<2y]                                            | ↓ risk                                                                                                                                                                                                                                                                                    | Hospital | Self-report | Case-control | Mat: age, sex, area; hospital-based                                                                                                                                                                                                                            | 15.6<br>2                  |
| Buckley, 1994               | USA                                            | 1982-1991   | 990<br>404   | 1636<br>440     | 0+        | ALL                                                                                                      | MMR, Sma, Mea                                             | ↓ risk for all & t-cell ALL after Sma with community controls; ↑ risk for ALL after MMR with cancer controls; others no association                                                                                                                                                       | Hospital | Self-report | Case-control | Exc: without complete estimates; Mat: age, race, area, family income; Children Cancer Group (CCG) study; population-based with & without cancer                                                                                                                | 21.0<br>5                  |

Table continues

**Supplementary Table 1.** Continued

| First Author, Year            | Location                                 | Study Years | No. of Cases | No. of Controls | Age Range | Cancer Sites               | Vaccines [Early Age]                                                                          | Results                                                                                                                                            | Outcome                                                                                                                                      | Exposure             | Study Design | Comment                                                                                                                                                | Study Quality <sup>a</sup>                                                                                                                                                |       |
|-------------------------------|------------------------------------------|-------------|--------------|-----------------|-----------|----------------------------|-----------------------------------------------------------------------------------------------|----------------------------------------------------------------------------------------------------------------------------------------------------|----------------------------------------------------------------------------------------------------------------------------------------------|----------------------|--------------|--------------------------------------------------------------------------------------------------------------------------------------------------------|---------------------------------------------------------------------------------------------------------------------------------------------------------------------------|-------|
| Shu, 1995                     | USA, Canada                              | 1982-1989   | 105          | 639             | <15       | Malignant germ-cell tumors | D, T, P, Polio, Mum, Mea, R, Sma                                                              | ↓ risk after Sma; others: no association                                                                                                           | Hospital                                                                                                                                     | Self-report          | Case-control | Exc: rare cancer; Adj: age, sex, gestational age, number livebirth (birth order), smoking during pregnancy, maternal education; population-based       | 22.46                                                                                                                                                                     |       |
| Kaatsch, 1996                 | Germany (Lower Saxony)                   | 1988-1993   | 348          | 433             | 0-14      | Leukemia                   | Not specified                                                                                 | ↓ vaccination rates in cases                                                                                                                       | Registry                                                                                                                                     | Self-report          | Case-control | Exc: without complete estimates; Mat: age, sex; population-based without & with cancer; original study Kaatsch 1998, Schüz 1999 & von Kries 2000       | 21.04                                                                                                                                                                     |       |
| Bhatia, 1997                  | USA, Canada                              |             | 459          | 683             | 3719      | 0-15                       | Langerhans cell histiocytosis (LCH)                                                           | D, P, T, Mea, R, Mum, Polio                                                                                                                        | ↓ risk for multisystem LCH after D, T, P, Mea, Mum, R & Polio ↓ risk for single-system LCH after D, Polio, R, Mum & P; others no association | Record               | Self-report  | Case-control                                                                                                                                           | Exc: rare cancer; Adj: age at questionnaire, area, birth year & order, annual household income, paternal education, maternal age; compared to community & cancer controls | 20.05 |
| Petridou, 1997 <sup>b,d</sup> | Greece                                   | 1993-1994   | 153          | 300             | 0-14      | Leukemia                   | DTP, BCG, viral (R, Mum, Mea, Hep)                                                            | No association                                                                                                                                     | Hospital                                                                                                                                     | Self-report          | Case-control | Mat: age, sex, area; hospital-based without cancer                                                                                                     | 19.04                                                                                                                                                                     |       |
| Kaatsch, 1998 <sup>d</sup>    | Germany (West Germany)                   | 1992-1994   | 2358         | 2588            | 0-14      | Leukemia                   | Number                                                                                        | ↓ risk for leukemia for 0-3 & 4-6 versus >6 vaccinations; other cancer (NHL, CNS, neuro- & nephroblastoma, bone, soft-tissuesarcoma) not indicated | Registry                                                                                                                                     | Self-report          | Case-control | Adj: socioeconomic status, urban-rural status; Mat: age, sex, area; population-based; update Kaatsch 1996 & original study Schüz 1999 & von Kries 2000 | 21.63                                                                                                                                                                     |       |
| Dockerty, 1999 <sup>d</sup>   | New Zealand                              | 1990-1993   | 121          | 121             | 0-14      | Leukemia                   | Any, number, routine, DTP, DT, BCG, Hep & other [>3m]; MMR & Mea [>9m]; Polio [>6m]; R [>15m] | ↓ risk for leukemia after 1-4 different vaccinations (adj. only for age & sex); others no association                                              | Registry                                                                                                                                     | Record (parent held) | Case-control | Adj: age, sex; Mat: age, sex; latency considered; population-based                                                                                     | 24.25                                                                                                                                                                     |       |
| Groves, 1999 <sup>d</sup>     | USA (IL, IN, IA, MI, MN, NJ, OH, PA, WI) | 1989-1993   | 439          | 439             | 0-14      | ALL                        | DTP, D, T, Polio, MMR, Hib                                                                    | ↓ risk for ALL after Hib (conjug.); others no association                                                                                          | -                                                                                                                                            | Record               | Case-control | Adj: age, sex, race, birth year, day care attendance, parental education, family income; Mat: age, race, telephone number; population-based            | 18.04                                                                                                                                                                     |       |

Table continues

**Supplementary Table 1.** Continued

| First Author, Year                  | Location                                                       | Study Years | No. of Cases | No. of Controls | Age Range | Cancer Sites                              | Vaccines [Early Age]                                                                      | Results                                                                                           | Outcome  | Exposure                 | Study Design         | Comment                                                                                                                                    | Study Quality <sup>a</sup> |
|-------------------------------------|----------------------------------------------------------------|-------------|--------------|-----------------|-----------|-------------------------------------------|-------------------------------------------------------------------------------------------|---------------------------------------------------------------------------------------------------|----------|--------------------------|----------------------|--------------------------------------------------------------------------------------------------------------------------------------------|----------------------------|
| Schüz, 1999 <sup>d</sup>            | Germany                                                        | 1980-1994   | 1010         | 1010            | 0-14      | AL, ALL                                   | Number (D, T, P, Polio, Mum, Mea, R, Sma, Men, routine)                                   | ↑ risk for leukemia for 0-3 & 4-6 versus >6 vaccinations                                          | Registry | Self-report              | Case-control         | Adj: socioeconomic status; Mat: sex, birth year; population-based non-diseased; update Kaatsch 1996 & 1998                                 | 22.2<br>4                  |
| Auvinen, 2000 <sup>d</sup>          | Finland                                                        | 1985-1987   | 77           | 113923          | 0-14      | Leukemia, ALL                             | Hib (PRP-D) [3, 4, 6 & 14/18m]                                                            | No association                                                                                    | Registry | Trial                    | Retrospective cohort | Adj: other vaccinations; Trial-based                                                                                                       | 35.4<br>6                  |
| Von Kries, 2000 <sup>d</sup>        | Germany (Lower Saxony)                                         | 1988-1993   | 420          | 613             | 0-15      | Cancer, leukemia, tumors                  | BCG [newborns]                                                                            | No association                                                                                    | Registry | Self-report              | Case-control         | Adj: age, sex; Mat: age, sex; population-based without cancer; power only 50%; update Kaatsch 1996 & 1998 & Schüz 1999                     | 22.2<br>5                  |
| Krone, 2003 <sup>d</sup>            | UK, Bulgaria, Italy, Germany, Estonia, Israel, Austria, France | 1994-1997   | 603          | 627             | 0+        | Malignant melanoma                        | BCG, Sma, Inf                                                                             | ↓ risk for for melanoma after BCG, smallpox or both in total & in several single countries        | Hospital | Self-report (some cards) | Case-control         | Adj: age, sex, race, study center, skin type, pigmented naevi, sunburns, freckling index; population-based                                 | 24.4<br>6                  |
| Frentzel-Beyme, 2004 <sup>d</sup>   | Austria                                                        | 1978-1988   | 88           | 208             | 8-25      | Osteo- & Ewing-sarcoma, other bone tumors | D, T, P, Polio, BCG, Chi, vaccination reaction                                            | ↓ risk after repeated pertussis vaccination in girls univariate; others no association            | Registry | Self-report              | Case-control         | Mat: age, sex; population-based, hospital-based                                                                                            | 21.0<br>5                  |
| Ma, 2005 <sup>d</sup>               | USA (California)                                               | 1995-2002   | 323          | 409             | 0-14      | Leukemia, ALL                             | DPT, Polio, MMR, Hep [<1y], Hib                                                           | ↓ risk for leukemia & ALL after Hib vaccination; others no association                            | Registry | Vaccination card         | Case-control         | Adj: birth weight, day care attendance, family income, maternal education; Mat: age, sex, mother's race, hispanic status; population-based | 23.2<br>5                  |
| Mallol-Mesnard, 2007 <sup>b,d</sup> | France                                                         | 2003-2004   | 776          | 1681            | <15       | AL, ALL, AML                              | Number [6m]; BCG [newborns]; D, T, P, Hep, Hib, Pne, Men & Polio [<6m]; Mum, Mea & R [1y] | ↑ risk of AML after 1-2 vaccinations <6 months compared to ≥4 vaccinations; others no association | Registry | Vaccination card         | Case-control         | Adj: age, sex, birth order, maternal and paternal educational level, degree of urbanization; Mat: age, sex; population-based               | 27.8<br>6                  |
| Daniels, 2008                       | USA, Canada                                                    | 1999-2003   | 521          | 517             | <16       | Wilms tumor                               | Any [prenatal]                                                                            | No association                                                                                    | Hospital | Self-report              | Case-control         | Exc: rare vaccination; Mat: age, area; Adj: age, area, sex, maternal education, household income; population based                         | 22.2<br>5                  |
| MacArthur, 2008 <sup>d</sup>        | Canada                                                         | 1990-1994   | 399          | 399             | 0-14      | Leukemia, ALL                             | D, T, P, Polio, Mum, Mea, R, BCG, Hep, other                                              | No association                                                                                    | Registry | Vaccination card         | Case-control         | Adj: race, family income, maternal education & age at birth, number of residences since birth; Mat: age, sex area; population-based        | 26.6<br>5                  |

Table continues

**Supplementary Table 1. Continued**

| First Author, Year    | Location    | Study Years | No. of Cases | No. of Controls | Age Range | Cancer Sites                                   | Vaccines [Early Age]                                        | Results                                                                                                                                                                                                             | Outcome  | Exposure         | Study Design              | Comment                                                                                                                                                                                                                                                                                     | Study Quality <sup>a</sup> |
|-----------------------|-------------|-------------|--------------|-----------------|-----------|------------------------------------------------|-------------------------------------------------------------|---------------------------------------------------------------------------------------------------------------------------------------------------------------------------------------------------------------------|----------|------------------|---------------------------|---------------------------------------------------------------------------------------------------------------------------------------------------------------------------------------------------------------------------------------------------------------------------------------------|----------------------------|
| Villumsen, 2009       | Denmark     | 1965-1976   | 71           | 2073            | 5-35      | Lymphoma, NHL, HL, leukemia                    | BCG, Sma                                                    | ↓ lymphoma risk after BCG; others: no association                                                                                                                                                                   | Registry | Vaccination card | Retrospective case-cohort | Adj: day care, family social class; register-based; Sub-cohort; update of Danish data in Waaler 1970                                                                                                                                                                                        | 27.6<br>8                  |
| Pagaoa, 2011          | USA (Texas) | 1995-2006   | 2800         | 11200           | 2-17      | Cancer, ALL, NHL, medullablastoma              | DTP, Polio, MMR, Chi, Hep, Hib, combination                 | ↓ risk for all cancers & ALL after Hib & for ALL after combined vaccination by region; ↓ risk for all cancers & ALL after Hep & for ALL after IPV, Hep & combined vaccination, ↑ risk for medullablastoma after Hib | Registry | Registry         | Ecological                | Adj: age, sex, race, birth weight, birth year, birth type, birth order, premature birth, maternal education, maternal marital status, prior births, diabetes, preterm labor, tobacco use, and alcohol use, mother age at birth; Mat: sex, birth year; 1:4; population- based without cancer | 13.7<br>5                  |
| Qu, 2014 <sup>b</sup> | China       | 1983-1990   | 17           | 649<br>97       | 0-30      | Hepatocellular carcinoma, primary liver cancer | Hep                                                         | ↓ risk for hepatocellular carcinoma                                                                                                                                                                                 | Registry | Trial            | Retrospective             | Exc: rare cancer; Adj: cluster; trial-based; mortality rates combined with incidence rates                                                                                                                                                                                                  | 32.4<br>7                  |
| Sankaran 2016         | USA         | 1982-1988   | 322          | 322             | 0-20      | Rhabdomyo-sarcoma                              | DTP, Polio, MMR, completed vs. non-completed                | ↓ risk for complete vaccination; ↑ risk for incomplete DTP to complete DTP; others no association                                                                                                                   | Trial    | Self-report      | Case-control              | Exc: rare cancer; Adj: family income, maternal education; Mat: age, sex, race; population-based; no controls for 8% cases                                                                                                                                                                   | 21.2<br>4                  |
| Soegaard, 2017        | Denmark     | 1981-2008   | 490          | 1224914         | 0-14      | ALL                                            | DTPolio [5, 6, 16m], P (<3, 10m], MMR, Hib [3-16m], routine | No association                                                                                                                                                                                                      | Registry | Registry         | Retrospective cohort      | Adj: sex, race, birth weight, year, order & mode, other vaccination, gestational age; down syndrome excluded; latency considered; register-                                                                                                                                                 | 37.0<br>8                  |
| Figueroa, 2019        | Costa Rica  | 1995-2003   | 240          | 578             | 1-15      | ALL                                            | Routine vaccination                                         | ↓ risk for ALL                                                                                                                                                                                                      | Registry | Self-report      | Case-control              | Adj: sex, birth year, SES                                                                                                                                                                                                                                                                   | 21.6<br>6                  |

|                                                                                       |                                                |
|---------------------------------------------------------------------------------------|------------------------------------------------|
| 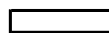 | = Not included in meta-analysis                |
|  | = Included in meta-analysis with cancer cases  |
|  | = Included in meta-analysis with cancer deaths |

Abbreviations: Adj, Adjustment; AL, Acute leukemia; ALL, Acute lymphoblastic leukemia; AML, Acute myeloid leukemia; BCG, Bacillus Calmette–Guérin (vaccine bacillus; tuberculosis); Chi, Chicken pox (varicella zoster); Cho, Cholera; D, Diphtheria; DT, Diphtheria-Tetanus; DTP, Diphtheria-Tetanus-Pertussis/Whooping cough; DTPolio, Diphtheria-Tetanus-Poliomyelitis; Exc, Exclusion for meta-analysis; Hep, Hepatitis; Hib, Haemophilus influenzae type b; Inf, Influenza; HL, Hodgkin lymphoma; m, months; Mat, Matching; Mea, Measles; Men, Meningococcus; MMR, Mumps-Measles-Rubella; MRC, Medical Research Council; Mum, Mumps; NHL, Non-Hodgkin lymphoma; Pne, Pneumococcus; Sma, Smallpox; Typ, Typhoid; y, years; Yel, Yellow fever.

<sup>a</sup> Calculation of crude ORs .

<sup>b</sup> Partly calculation of crude ORs not included in meta-analysis

<sup>c</sup> Calculation of crude ORs taking individual matching into account.

<sup>d</sup> Study included in meta-analysis.

<sup>e</sup> Cancer, leukemia, lymphoma, HL, nervous system, bone, kidney, ovary, male genitalia, skin, bladder, salivary glands, mouth, esophagus, stomach, colon, liver, larynx, lungs, breast, cervix, uterus, other endocrine organs, connective tissue.

<sup>f</sup> Cancer, leukemia, multiple myeloma, lymphatic tissue, HL, brain, other nervous system, bone, kidney, bladder, other urinary organs, ovary, prostate, other female/male genital organs, eye, skin, other skin, breast, bronchus & lung, cervix, connective tissue, esophagus, large intestine, larynx, liver, mouth, nose, other digestive organs, other endocrine glands, pancreas, peritoneum, rectum, salivary gland, stomach, thyroid, tonsil, uterus.

<sup>g</sup> Study quality with detailed quality score (-6 to 45 points) and Newcastle-Ottawa Scale (0 to 9 points).
